# Supplementary material for: Comparative genome analysis of a new Tequintavirus isolated on Salmonella enterica serotype Tennessee
Source: Research Square preprint supplement (doi:10.21203/rs.3.rs-6981461/v1), 2025-08-21
Supplement: Supplementary file 1 [file 38d1417a899ba0a55ef8ac27.pdf]

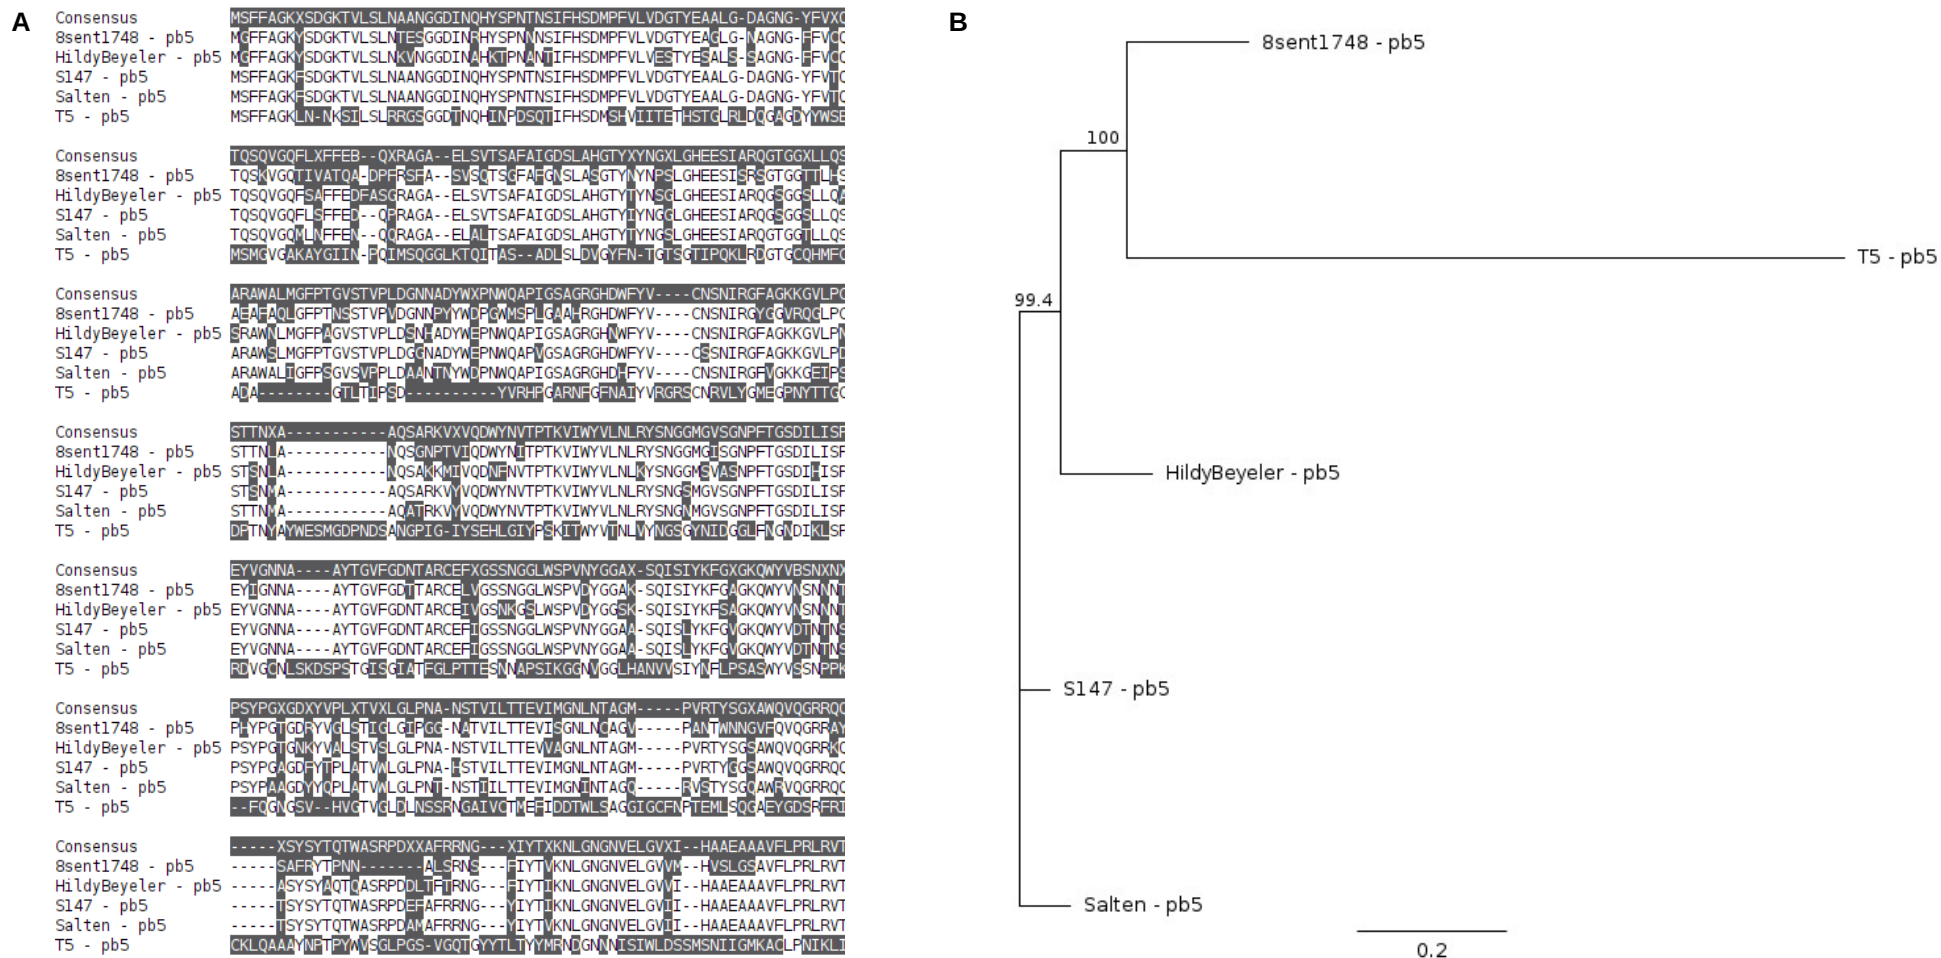

**Figure S3. RBPpb5 comparison among the four representative Tequintaviruses and Salten.** **A-** MUSCLE alignment of the five aminoacid RBPpb5 sequences. **B-** RBPpb5 phylogenetic relationship reconstruction, constructed with Geneious Tree builder with Jukes-Cantor genetic distance model and neighbor-joining build method with bootstrap 1000.
