# Supplementary material for: Comparative genome analysis of a new Tequintavirus isolated on Salmonella enterica serotype Tennessee
Source: Research Square preprint supplement (doi:10.21203/rs.3.rs-6981461/v1), 2025-08-21
Supplement: Supplementary file 3 [file ebd4da47d16a6b27b468a7b7.pdf]

**Table S1: Salten CDSs list after BV-BRC annotation.**

| CDS   | Start | End  | Length | Strand | AA Length | Product              | Function                       |
|-------|-------|------|--------|--------|-----------|----------------------|--------------------------------|
| CDS1  | 1     | 735  | 735    | -      | 244       | dmp                  | Second step DNA insertion [46] |
| CDS2  | 815   | 1207 | 393    | -      | 130       | Phage protein        |                                |
| CDS3  | 1274  | 2944 | 1671   | -      | 556       | A1 protein           | Second step DNA insertion [46] |
| CDS4  | 3042  | 3239 | 198    | -      | 65        | Phage protein        |                                |
| CDS5  | 3298  | 3714 | 417    | -      | 138       | A2 protein           | Second step DNA insertion      |
| CDS6  | 3813  | 4064 | 252    | -      | 83        | Phage protein        |                                |
| CDS7  | 4212  | 4325 | 114    | +      | 37        | hypothetical protein |                                |
| CDS8  | 4353  | 4508 | 156    | +      | 51        | hypothetical protein |                                |
| CDS9  | 4501  | 4659 | 159    | -      | 52        | hypothetical protein |                                |
| CDS10 | 4715  | 4936 | 222    | -      | 73        | hypothetical protein |                                |
| CDS11 | 5010  | 5102 | 93     | +      | 30        | hypothetical protein |                                |
| CDS12 | 5455  | 5607 | 153    | +      | 50        | hypothetical protein |                                |
| CDS13 | 5627  | 5740 | 114    | +      | 37        | Phage protein        |                                |
| CDS14 | 5860  | 6087 | 228    | +      | 75        | Phage protein        |                                |
| CDS15 | 6134  | 6289 | 156    | +      | 51        | Phage protein        |                                |
| CDS16 | 6283  | 6495 | 213    | +      | 70        | Phage protein        |                                |
| CDS17 | 6495  | 6608 | 114    | +      | 37        | hypothetical protein |                                |
| CDS18 | 6602  | 6949 | 348    | +      | 115       | Phage protein        |                                |
| CDS19 | 6942  | 7079 | 138    | +      | 45        | hypothetical protein |                                |
| CDS20 | 7076  | 7174 | 99     | +      | 32        | hypothetical protein |                                |
| CDS21 | 7191  | 7310 | 120    | -      | 39        | hypothetical protein |                                |
| CDS22 | 7634  | 7864 | 231    | -      | 76        | hypothetical protein |                                |
| CDS23 | 7924  | 8202 | 279    | -      | 92        | hypothetical protein |                                |
| CDS24 | 8195  | 8314 | 120    | -      | 39        | hypothetical protein |                                |
| CDS25 | 8648  | 8746 | 99     | +      | 32        | hypothetical protein |                                |
| CDS26 | 8855  | 8947 | 93     | +      | 30        | hypothetical protein |                                |

|       |       |       |     |   |     |                                               |                                             |
|-------|-------|-------|-----|---|-----|-----------------------------------------------|---------------------------------------------|
| CDS27 | 8904  | 9791  | 888 | - | 295 | Phage protein                                 |                                             |
| CDS28 | 9861  | 10109 | 249 | - | 82  | hypothetical protein                          |                                             |
| CDS29 | 10109 | 10720 | 612 | - | 203 | Phage protein                                 |                                             |
| CDS30 | 10720 | 10905 | 186 | - | 61  | Phage protein                                 |                                             |
| CDS31 | 10905 | 11138 | 234 | - | 77  | Phage protein                                 |                                             |
| CDS32 | 11349 | 11867 | 519 | - | 172 | Phage protein                                 |                                             |
| CDS33 | 11913 | 12110 | 198 | - | 65  | Phage protein                                 |                                             |
| CDS34 | 12207 | 12335 | 129 | - | 42  | Phage protein                                 |                                             |
| CDS35 | 12346 | 12729 | 384 | - | 127 | Phage capsid and scaffold                     |                                             |
| CDS36 | 12671 | 13138 | 468 | - | 155 | Phage protein                                 |                                             |
| CDS37 | 13135 | 13335 | 201 | - | 66  | Phage protein                                 |                                             |
| CDS38 | 13435 | 13761 | 327 | - | 108 | Phage protein                                 |                                             |
| CDS39 | 13751 | 13993 | 243 | - | 80  | Phage protein                                 |                                             |
| CDS40 | 13990 | 14271 | 282 | - | 93  | Phage protein                                 |                                             |
| CDS41 | 14271 | 14435 | 165 | - | 54  | Phage protein                                 |                                             |
| CDS42 | 14435 | 14686 | 252 | - | 83  | Phage protein                                 |                                             |
| CDS43 | 14765 | 15196 | 432 | - | 143 | Phage protein                                 |                                             |
| CDS44 | 15249 | 15371 | 123 | - | 40  | hypothetical protein                          |                                             |
| CDS45 | 15364 | 15954 | 591 | - | 196 | Phosphoesterase                               |                                             |
| CDS46 | 15954 | 16241 | 288 | - | 95  | hypothetical protein                          |                                             |
| CDS47 | 16241 | 17092 | 852 | - | 283 | putative serine/threonine protein phosphatase | Host or viral protein degradation [47] [48] |
| CDS48 | 17095 | 17340 | 246 | - | 81  | Phage protein                                 |                                             |
| CDS49 | 17345 | 17722 | 378 | - | 125 | Phage protein                                 |                                             |
| CDS50 | 17850 | 18140 | 291 | - | 96  | Thioredoxin, phage-associated                 | Enzyme maturation                           |
| CDS51 | 18137 | 18664 | 528 | - | 175 | Phage HNH homing endonuclease (ACLAME 27)     |                                             |
| CDS52 | 18661 | 19065 | 405 | - | 134 | Phage protein                                 |                                             |
| CDS53 | 19141 | 19563 | 423 | - | 140 | Phage protein                                 |                                             |

|       |       |       |     |   |     |                                                                                |                                             |
|-------|-------|-------|-----|---|-----|--------------------------------------------------------------------------------|---------------------------------------------|
|       |       |       |     |   |     |                                                                                |                                             |
| CDS54 | 19637 | 20050 | 414 | - | 137 | endolysin                                                                      | Perforation of the host membrane [49]       |
| CDS55 | 20047 | 20730 | 684 | - | 227 | Phage holin                                                                    | Perforation of the host membrane [49]       |
| CDS56 | 20879 | 21460 | 582 | - | 193 | ATP-dependent Clp protease proteolytic subunit ClpP (EC 3.4.21.92)             | Host or viral protein degradation [47] [48] |
| CDS57 | 21473 | 22225 | 753 | - | 250 | dNMP kinase                                                                    |                                             |
| CDS58 | 22225 | 22578 | 354 | - | 117 | Phage protein                                                                  |                                             |
| CDS59 | 22509 | 22952 | 444 | - | 147 | Phage protein                                                                  |                                             |
| CDS60 | 22949 | 23629 | 681 | - | 226 | Phage protein                                                                  |                                             |
| CDS61 | 23784 | 24131 | 348 | - | 115 | Phage protein                                                                  |                                             |
| CDS62 | 24128 | 24625 | 498 | - | 165 | Phage HNH homing endonuclease (ACLAME 27)                                      |                                             |
| CDS63 | 24739 | 25023 | 285 | - | 94  | Phage protein                                                                  |                                             |
| CDS64 | 25020 | 25316 | 297 | - | 98  | Phage protein                                                                  |                                             |
| CDS65 | 25294 | 25713 | 420 | - | 139 | Phage protein                                                                  |                                             |
| CDS66 | 25682 | 25987 | 306 | - | 101 | Phage protein                                                                  |                                             |
| CDS67 | 25989 | 26192 | 204 | - | 67  | hypothetical protein                                                           |                                             |
| CDS68 | 26192 | 26470 | 279 | - | 92  | Phage protein                                                                  |                                             |
| CDS69 | 26547 | 26894 | 348 | - | 115 | Phage protein                                                                  |                                             |
| CDS70 | 27016 | 27192 | 177 | - | 58  | Phage protein                                                                  |                                             |
| CDS71 | 27251 | 27412 | 162 | - | 53  | hypothetical protein                                                           |                                             |
| CDS72 | 27412 | 27780 | 369 | - | 122 | 2-ketobutyrate formate-lyase (EC 2.3.1.-) Pyruvate formate-lyase (EC 2.3.1.54) |                                             |
| CDS73 | 28068 | 28358 | 291 | - | 96  | Phage protein                                                                  |                                             |
| CDS74 | 28518 | 28682 | 165 | - | 54  | Phage protein                                                                  |                                             |
| CDS75 | 28675 | 28926 | 252 | - | 83  | Phage protein                                                                  |                                             |
| CDS76 | 29190 | 29426 | 237 | - | 78  | hypothetical protein                                                           |                                             |

|        |       |       |     |   |     |                                      |  |
|--------|-------|-------|-----|---|-----|--------------------------------------|--|
|        |       |       |     |   |     |                                      |  |
| CDS77  | 29419 | 29616 | 198 | - | 65  | Phage protein                        |  |
| CDS78  | 29793 | 29933 | 141 | + | 46  | hypothetical protein                 |  |
| CDS79  | 29930 | 30097 | 168 | + | 55  | hypothetical protein                 |  |
| CDS80  | 30084 | 30173 | 90  | + | 29  | hypothetical protein                 |  |
| CDS81  | 30288 | 30518 | 231 | - | 76  | hypothetical protein                 |  |
| CDS82  | 30815 | 31078 | 264 | - | 87  | Phage protein                        |  |
| CDS83  | 31284 | 31373 | 90  | - | 29  | hypothetical protein                 |  |
| CDS84  | 31632 | 31769 | 138 | + | 45  | hypothetical protein                 |  |
| CDS85  | 31762 | 31875 | 114 | + | 37  | hypothetical protein                 |  |
| CDS86  | 32070 | 32288 | 219 | + | 72  | hypothetical protein                 |  |
| CDS87  | 32280 | 32627 | 348 | - | 115 | Phage protein                        |  |
| CDS88  | 32735 | 32893 | 159 | - | 52  | hypothetical protein                 |  |
| CDS89  | 32997 | 33182 | 186 | - | 61  | Phage protein                        |  |
| CDS90  | 33668 | 33940 | 273 | - | 90  | Phage protein                        |  |
| CDS91  | 34219 | 34386 | 168 | + | 55  | hypothetical protein                 |  |
| CDS92  | 34494 | 34769 | 276 | - | 91  | Phage protein                        |  |
| CDS93  | 34860 | 35066 | 207 | - | 68  | Phage protein                        |  |
| CDS94  | 35059 | 35226 | 168 | - | 55  | Phage protein                        |  |
| CDS95  | 35325 | 35414 | 90  | - | 29  | hypothetical protein                 |  |
| CDS96  | 35420 | 35605 | 186 | - | 61  | Phage antitermination protein Q      |  |
| CDS97  | 35615 | 35803 | 189 | - | 62  | hypothetical protein                 |  |
| CDS98  | 36017 | 36586 | 570 | - | 189 | Phage protein                        |  |
| CDS99  | 36612 | 36740 | 129 | - | 42  | hypothetical protein                 |  |
| CDS100 | 36821 | 37768 | 948 | - | 315 | Phage protein                        |  |
| CDS101 | 37947 | 38060 | 114 | - | 37  | hypothetical protein                 |  |
| CDS102 | 38152 | 38352 | 201 | + | 66  | hypothetical protein                 |  |
| CDS103 | 38576 | 39058 | 483 | - | 160 | Phage-associated homing endonuclease |  |
| CDS104 | 39102 | 39545 | 444 | - | 147 | Phage protein                        |  |
| CDS105 | 39545 | 39715 | 171 | - | 56  | Phage protein                        |  |

|        |       |       |      |   |     |                                                                             |                             |
|--------|-------|-------|------|---|-----|-----------------------------------------------------------------------------|-----------------------------|
| CDS106 | 39784 | 40233 | 450  | - | 149 | Phage protein                                                               |                             |
| CDS107 | 40239 | 40556 | 318  | - | 105 | Phage protein                                                               |                             |
| CDS108 | 40572 | 40676 | 105  | - | 34  | hypothetical protein                                                        |                             |
| CDS109 | 40999 | 41637 | 639  | - | 212 | Phage tail fibre protein                                                    |                             |
| CDS110 | 41691 | 41873 | 183  | - | 60  | Phage protein                                                               |                             |
| CDS111 | 41945 | 42646 | 702  | - | 233 | Metallopeptidase, phage-associated                                          |                             |
| CDS112 | 42675 | 42911 | 237  | - | 78  | Phage protein                                                               |                             |
| CDS113 | 42953 | 43468 | 516  | - | 171 | Phage protein                                                               |                             |
| CDS114 | 43552 | 43830 | 279  | - | 92  | Phage protein                                                               |                             |
| CDS115 | 43907 | 44383 | 477  | - | 158 | Phage ribonuclease H (EC 3.1.26.4)                                          |                             |
| CDS116 | 44383 | 44652 | 270  | - | 89  | hypothetical protein                                                        |                             |
| CDS117 | 44652 | 44933 | 282  | - | 93  | hypothetical protein                                                        |                             |
| CDS118 | 45031 | 45870 | 840  | - | 279 | Thymidylate synthase (EC 2.1.1.45)                                          | Nucleotides metabolism [50] |
| CDS119 | 45870 | 46400 | 531  | - | 176 | Dihydrofolate reductase, phage-associated                                   | nucleotides metabolism [50] |
| CDS120 | 46397 | 47542 | 1146 | - | 381 | Ribonucleotide reductase of class Ia (aerobic), beta subunit (EC 1.17.4.1)  | nucleotides metabolism [51] |
| CDS121 | 47561 | 47674 | 114  | - | 37  | hypothetical protein                                                        |                             |
| CDS122 | 47649 | 50087 | 2439 | - | 812 | Ribonucleotide reductase of class Ia (aerobic), alpha subunit (EC 1.17.4.1) | Nucleotides metabolism [51] |
| CDS123 | 50127 | 50324 | 198  | - | 65  | Phage protein                                                               |                             |
| CDS124 | 50326 | 51078 | 753  | - | 250 | Phage phosphate starvation-inducible protein PhoH (ACLAME 589)              |                             |

|        |       |       |      |   |     |                                                                                |                                   |
|--------|-------|-------|------|---|-----|--------------------------------------------------------------------------------|-----------------------------------|
| CDS125 | 51095 | 51199 | 105  | + | 34  | hypothetical protein                                                           |                                   |
| CDS126 | 51452 | 53326 | 1875 | + | 624 | Ribonucleotide reductase of class III (anaerobic), large subunit (EC 1.17.4.2) | Nucleotides metabolism [51]       |
| CDS127 | 53426 | 53665 | 240  | + | 79  | Phage protein                                                                  |                                   |
| CDS128 | 53662 | 54060 | 399  | + | 132 | Phage protein                                                                  |                                   |
| CDS129 | 54035 | 54241 | 207  | + | 68  | Phage protein                                                                  |                                   |
| CDS130 | 54210 | 54404 | 195  | + | 64  | Phage protein                                                                  |                                   |
| CDS131 | 54404 | 55228 | 825  | + | 274 | NAD-dependent protein deacetylase of SIR2 family                               |                                   |
| CDS132 | 55219 | 55401 | 183  | + | 60  | Phage protein                                                                  |                                   |
| CDS133 | 55388 | 55894 | 507  | + | 168 | Phage protein                                                                  |                                   |
| CDS134 | 55897 | 56325 | 429  | + | 142 | Phage protein                                                                  |                                   |
| CDS135 | 56335 | 56727 | 393  | + | 130 | Phage protein                                                                  |                                   |
| CDS136 | 56762 | 56863 | 102  | + | 33  | hypothetical protein                                                           |                                   |
| CDS137 | 56996 | 57148 | 153  | + | 50  | hypothetical protein                                                           |                                   |
| CDS138 | 57293 | 60229 | 2937 | + | 978 | hypothetical protein                                                           |                                   |
| CDS139 | 60216 | 60449 | 234  | + | 77  | Phage protein                                                                  |                                   |
| CDS140 | 60521 | 61225 | 705  | + | 234 | Phage DNA helicase                                                             | DNA transcription and replication |
| CDS141 | 61218 | 61469 | 252  | + | 83  | Transcriptional regulator                                                      |                                   |
| CDS142 | 61573 | 61983 | 411  | + | 136 | DNA-binding protein                                                            |                                   |
| CDS143 | 61998 | 62285 | 288  | + | 95  | Phage protein                                                                  |                                   |
| CDS144 | 62336 | 62644 | 309  | + | 102 | Transcriptional regulator                                                      |                                   |
| CDS145 | 62731 | 63003 | 273  | + | 90  | hypothetical protein                                                           |                                   |
| CDS146 | 63004 | 63975 | 972  | + | 323 | DNA ligase, phage-associated                                                   | DNA transcription and replication |
| CDS147 | 63948 | 64070 | 123  | + | 40  | hypothetical protein                                                           |                                   |

|        |       |       |      |   |     |                                                       |                                                                                                                      |
|--------|-------|-------|------|---|-----|-------------------------------------------------------|----------------------------------------------------------------------------------------------------------------------|
| CDS148 | 64178 | 64957 | 780  | + | 259 | DNA ligase, phage-associated                          | DNA transcription and replication                                                                                    |
| CDS149 | 64950 | 65717 | 768  | + | 255 | Transcriptional regulator                             |                                                                                                                      |
| CDS150 | 65777 | 66358 | 582  | + | 193 | hypothetical protein                                  |                                                                                                                      |
| CDS151 | 66351 | 67817 | 1467 | + | 488 | Phage DNA helicase                                    | DNA transcription and replication                                                                                    |
| CDS152 | 67814 | 68344 | 531  | + | 176 | Phage protein, contains HNH endonuclease motif        |                                                                                                                      |
| CDS153 | 68341 | 69231 | 891  | + | 296 | Phage DNA primase/helicase                            | DNA transcription and replication                                                                                    |
| CDS154 | 69384 | 71861 | 2478 | + | 825 | DNA polymerase, phage-associated                      | DNA transcription and replication                                                                                    |
| CDS155 | 71854 | 72351 | 498  | + | 165 | Phage protein                                         |                                                                                                                      |
| CDS156 | 72348 | 73700 | 1353 | + | 450 | Phage DNA helicase                                    | DNA transcription and replication                                                                                    |
| CDS157 | 73921 | 74205 | 285  | + | 94  | Phage protein                                         |                                                                                                                      |
| CDS158 | 74198 | 74971 | 774  | + | 257 | DNA-binding protein                                   |                                                                                                                      |
| CDS159 | 75008 | 75985 | 978  | + | 325 | Phage-associated recombinase                          | Detection and repair of double-stranded                                                                              |
| CDS160 | 75966 | 77804 | 1839 | + | 612 | Phage recombination related exonuclease (EC 3.1.11.-) | DNA breaks.<br>Orthologous to Mre11 - Rad50 (eukaryotes), SbcCD (prokaryotes), gp46/gp47 (T4), gpD13/gpD12 (T5) [52] |
| CDS161 | 77808 | 78290 | 483  | + | 160 | Phage protein                                         |                                                                                                                      |

|        |        |        |      |   |      |                                                                |                                                               |
|--------|--------|--------|------|---|------|----------------------------------------------------------------|---------------------------------------------------------------|
| CDS162 | 78290  | 79165  | 876  | + | 291  | Phage endonuclease                                             | DNA transcription and replication                             |
| CDS163 | 79162  | 79608  | 447  | + | 148  | Deoxyuridine 5'-triphosphate nucleotidohydrolase (EC 3.6.1.23) | Removing excess of dUTP mistakenly incorporated into DNA [53] |
| CDS164 | 79625  | 79834  | 210  | + | 69   | Phage protein                                                  |                                                               |
| CDS165 | 79875  | 84026  | 4152 | - | 1383 | Phage long tail fibre pb1                                      |                                                               |
| CDS166 | 84026  | 84448  | 423  | - | 140  | p132                                                           |                                                               |
| CDS167 | 84453  | 86555  | 2103 | - | 700  | pb4                                                            |                                                               |
| CDS168 | 86556  | 89405  | 2850 | - | 949  | pb3                                                            |                                                               |
| CDS169 | 89402  | 90016  | 615  | - | 204  | pb9                                                            |                                                               |
| CDS170 | 90019  | 90108  | 90   | - | 29   | hypothetical protein                                           |                                                               |
| CDS171 | 90126  | 93833  | 3708 | - | 1235 | pb2                                                            |                                                               |
| CDS172 | 93918  | 94286  | 369  | - | 122  | Phage protein                                                  |                                                               |
| CDS173 | 94348  | 94752  | 405  | - | 134  | Phage protein                                                  |                                                               |
| CDS174 | 94752  | 95648  | 897  | - | 298  | p140                                                           |                                                               |
| CDS175 | 95653  | 97044  | 1392 | - | 463  | Phage major tail protein pb6                                   |                                                               |
| CDS176 | 97071  | 97559  | 489  | - | 162  | p142                                                           |                                                               |
| CDS177 | 97563  | 98330  | 768  | - | 255  | Phage protein                                                  |                                                               |
| CDS178 | 98330  | 98842  | 513  | - | 170  | Phage protein                                                  |                                                               |
| CDS179 | 98895  | 99494  | 600  | - | 199  | hypothetical protein                                           |                                                               |
| CDS180 | 99551  | 100927 | 1377 | - | 458  | Phage capsid and scaffold                                      |                                                               |
| CDS181 | 100945 | 101577 | 633  | - | 210  | Phage capsid and scaffold                                      |                                                               |
| CDS182 | 101581 | 101904 | 324  | - | 107  | Phage tail fibre                                               |                                                               |
| CDS183 | 101907 | 103118 | 1212 | - | 403  | Phage portal (connector) protein                               |                                                               |
| CDS184 | 103118 | 103555 | 438  | - | 145  | Phage protein                                                  |                                                               |
| CDS185 | 103545 | 104219 | 675  | - | 224  | Phage protein                                                  |                                                               |



|        |        |        |      |   |     |                                         |                       |
|--------|--------|--------|------|---|-----|-----------------------------------------|-----------------------|
| CDS186 | 104179 | 104379 | 201  | - | 66  | Phage protein                           |                       |
| CDS187 | 104391 | 105707 | 1317 | - | 438 | Phage terminase,<br>large subunit       | DNA packaging<br>[46] |
| CDS188 | 105707 | 106189 | 483  | - | 160 | Phage terminase,<br>small subunit       | DNA packaging<br>[54] |
| CDS189 | 106200 | 107981 | 1782 | - | 593 | RBP pb5                                 |                       |
| CDS190 | 108065 | 108331 | 267  | + | 88  | Phage protein                           |                       |
| CDS191 | 108406 | 108708 | 303  | + | 100 | Phage protein                           |                       |
| CDS192 | 108659 | 109198 | 540  | + | 179 | Phage-associated<br>homing endonuclease |                       |
| CDS193 | 109195 | 109299 | 105  | + | 34  | Phage protein                           |                       |
| CDS194 | 109299 | 109406 | 108  | + | 35  | Phage protein                           |                       |
| CDS195 | 109403 | 109597 | 195  | + | 64  | Phage protein                           |                       |
| CDS196 | 109590 | 109835 | 246  | + | 81  | Phage protein                           |                       |
| CDS197 | 109868 | 109996 | 129  | + | 42  | hypothetical protein                    |                       |
