# Supplementary material for: Comparative genome analysis of a new Tequintavirus isolated on Salmonella enterica serotype Tennessee
Source: Research Square preprint supplement (doi:10.21203/rs.3.rs-6981461/v1), 2025-08-21
Supplement: Supplementary file 4 [file f1f2983a851debe7a4cb3ef9.pdf]

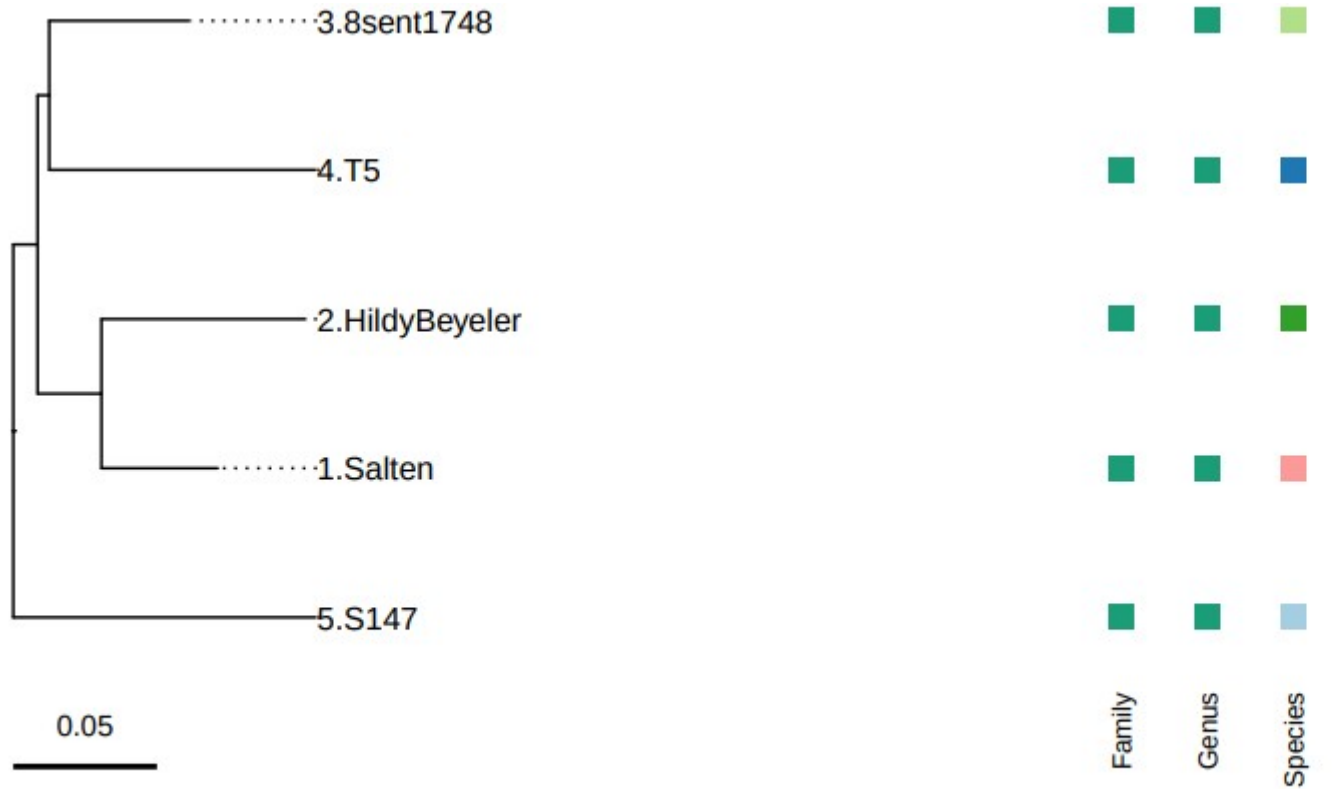

**Figure S1. VICTOR phylogenetic tree (D0 formula) of the four representative genomes and *Salmonella Phage Tennessee Salten*, generated by FastME v.2.1.4.** They belong to the same family (*Demerecviridae*) and the same genus (*Tequintavirus*) but to different species, as represented by the colors.
